# Supplementary material for: Dissecting the correlates of N-terminal prohormone brain natriuretic peptide in acute infective endocarditis
Source: Springer Nature journal article supplement (doi:10.1007/s15010-022-01813-y), 2022-04-16
Supplement: MOESM1 [file 20318116]

1 **Dissecting the correlates of N-terminal prohormone brain natriuretic peptide**  
2 **in acute infective endocarditis - Infection**

3  
4 Lorenzo Bertolino<sup>a</sup>, Maria Paola Ursi<sup>a</sup>, Domenico Iossa<sup>a</sup>, Arta Karruli<sup>a</sup>, Fabiana D'Amico<sup>a</sup>, Rosa Zampino<sup>a,b</sup>, Giovanni  
5 Dialetto<sup>c</sup>, Marisa De Feo<sup>c</sup>, Emanuele Durante-Mangoni<sup>b,d</sup>; on behalf of the Monaldi Hospital Cardiovascular Infection  
6 Study Group (see Appendix)

7  
8 <sup>a</sup>Department of Advanced Medical & Surgical Sciences, University of Campania 'L. Vanvitelli', Napoli, Italy

9 <sup>b</sup>Unit of Infectious and Transplant Medicine, AORN Ospedali dei Colli-Monaldi Hospital, Napoli, Italy

10 <sup>c</sup>Unit of Cardiac Surgery, AORN Ospedali dei Colli-Monaldi Hospital, Napoli, Italy

11 <sup>d</sup>Department of Precision Medicine, University of Campania 'L. Vanvitelli' Napoli, Italy

12  
13  
14  
15  
16  
17  
18  
19  
20  
21  
22  
23  
24 **Corresponding author:**

25 Emanuele Durante Mangoni, MD PhD

26 Ospedale Monaldi, Piazzale Ettore Ruggieri

27 80131 Napoli, Italy

28 Ph: +39.081.7062475

29 Fax: +39.081.7702645

30 Email: [emanuele.durante@unicampania.it](mailto:emanuele.durante@unicampania.it)

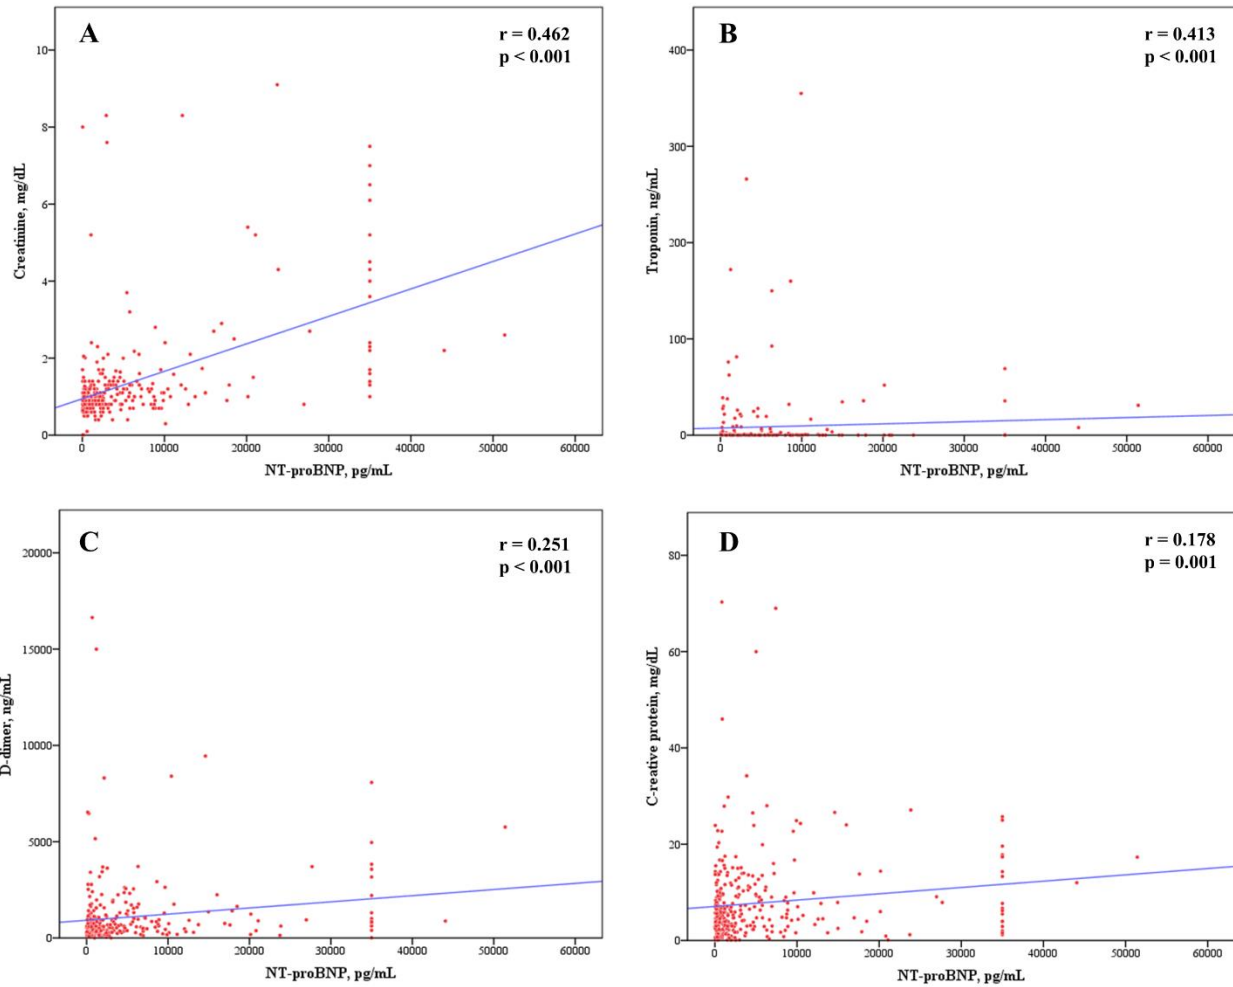

32 **Supplementary Fig 1** Spearman correlation analyses of NT-proBNP levels with other biomarkers. (A) Correlation  
 33 between NT-proBNP and creatinine, (B) Correlation between NT-proBNP and hs-troponin I, (C) Correlation between  
 34 NT-proBNP and d-dimers, (D) Correlation between NT-proBNP and C-reactive protein

35 *Color in print for this figure is not necessary*

36

37

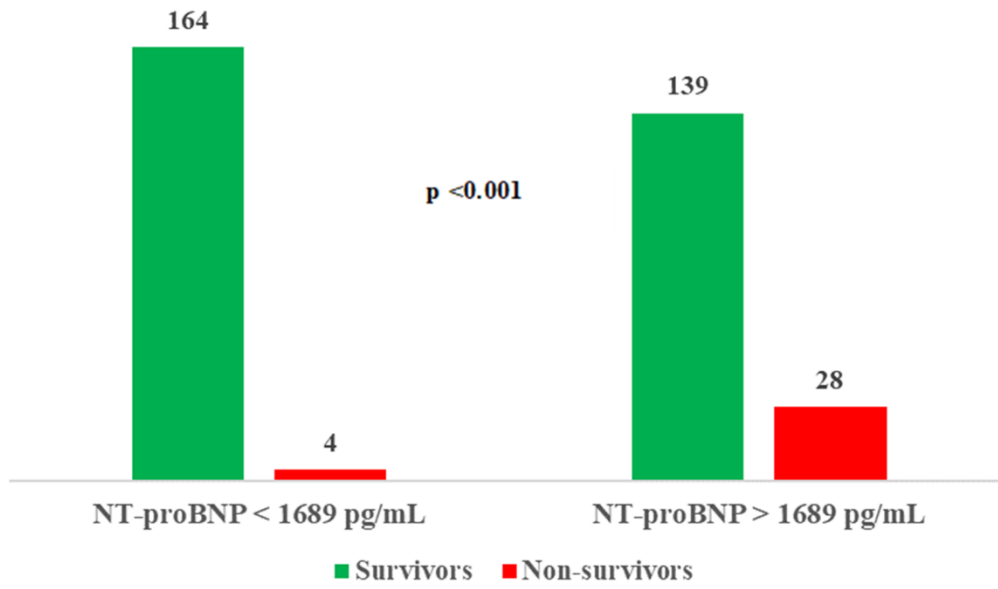

38

39 **Supplementary Fig 2** Bar chart showing the number of cases with positive or negative in-hospital outcome according to

40 NT-proBNP median value

41 *Color in print for this figure is not necessary*

42

43
